# Supplementary material for: Carrier mobility and optical properties of a type-II GaSe/ZnS heterostructure as a photocatalyst: a first-principles study
Source: Royal Society of Chemistry journal article supplement (doi:10.1039/d4cp00972j), 2024-01-01
Supplement: d4cp00972j1.pdf [file d4cp00972j1.pdf]

# Carrier mobility and Optical properties of a type-II GaSe/ZnS heterostructure as photocatalyst: A First-Principles Study

Yongqiang Ma, Aida Bao\*, Xin Guo\*, Jie Wang

National Key Laboratory for Electronic Measurement Technology, North University of China, Taiyuan, 030051, China

\*E-mail: guoxin2019@nuc.edu.cn; baoaida@126.com

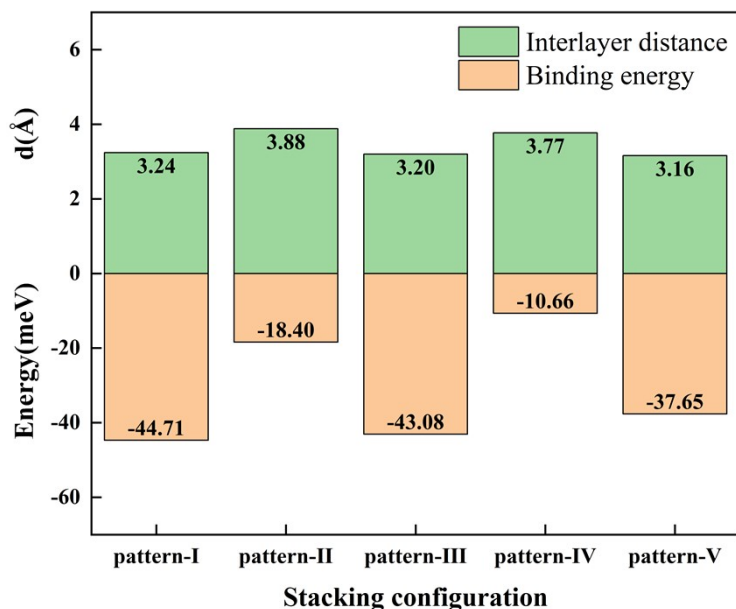

Fig.S1 Binding energy  $E_b$  (eV) and layer spacing  $d$  (Å) for five different conformations.

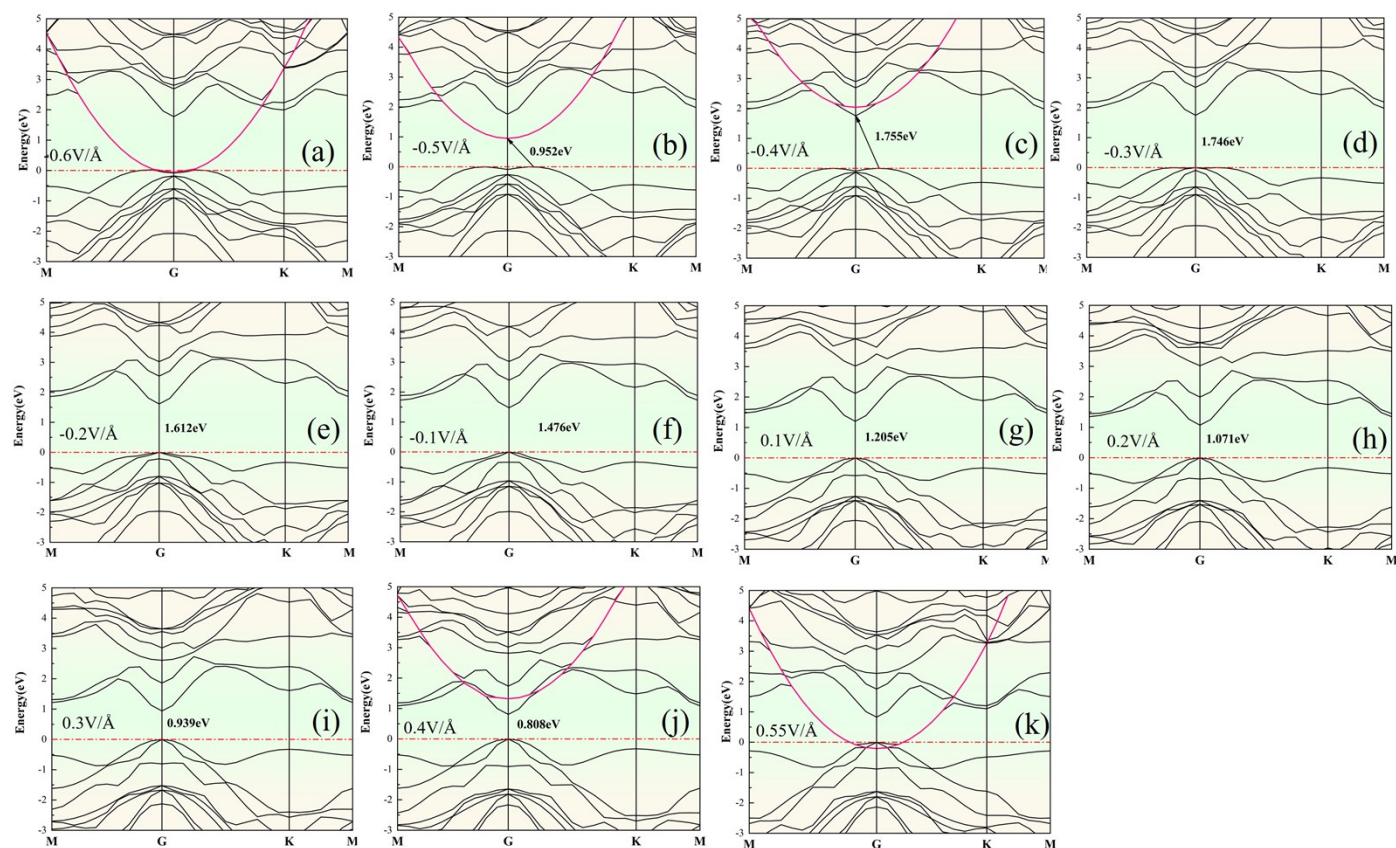

Fig.S2 (a-k) Electronic band structures of GaSe/ZnS vdWH under different electric fields (-0.6 V/Å to +0.55 V/Å).

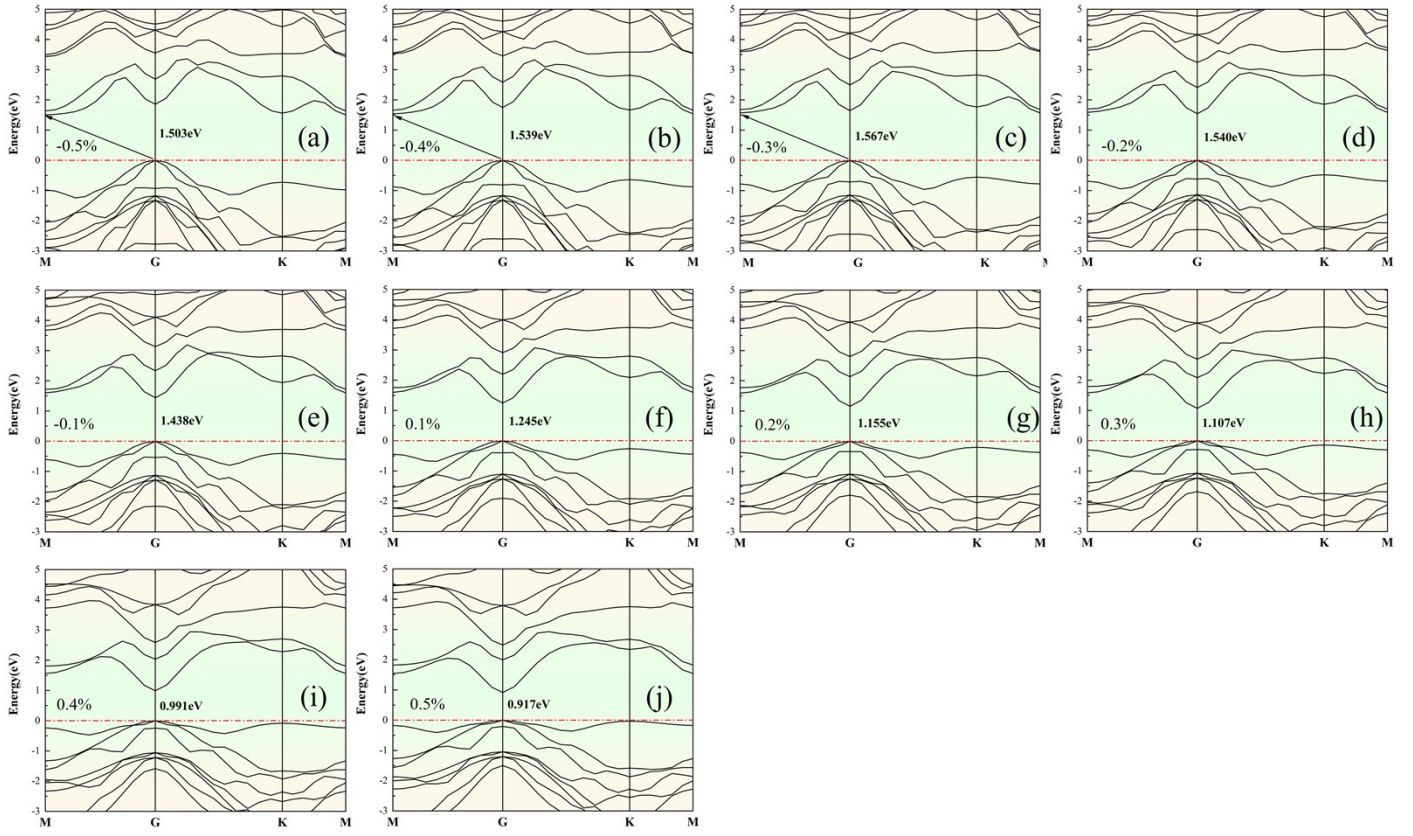

**Fig.S3 (a-j)** Electronic band structures of GaSe/ZnS vdWH under different biaxial strain (-5% to -5%).

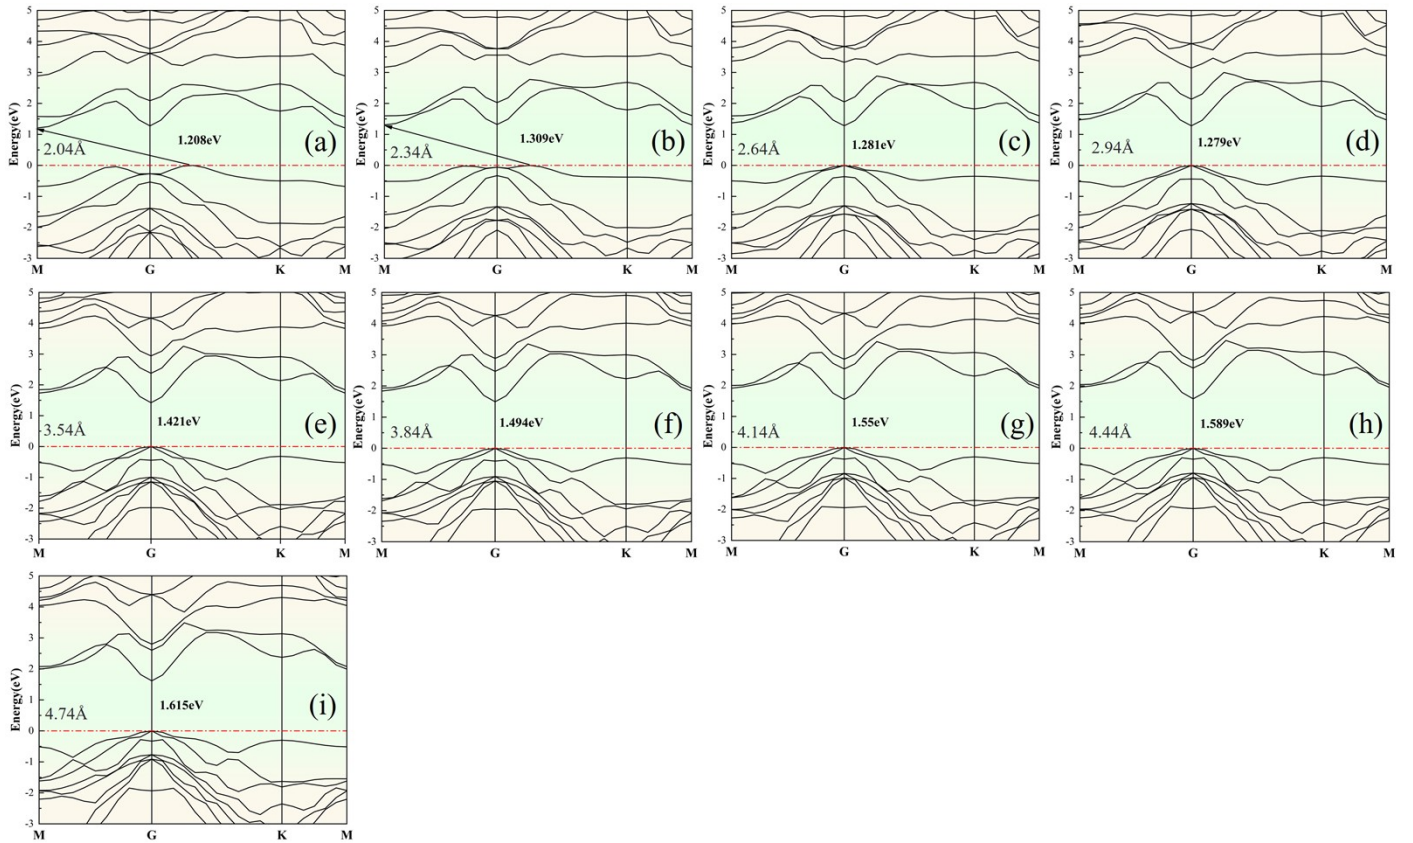

**Fig.S4 (a-i)** The band structure of GaSe/ZnS vdWH with interlayer spacing ranging from 2.04 Å to 4.74 Å.

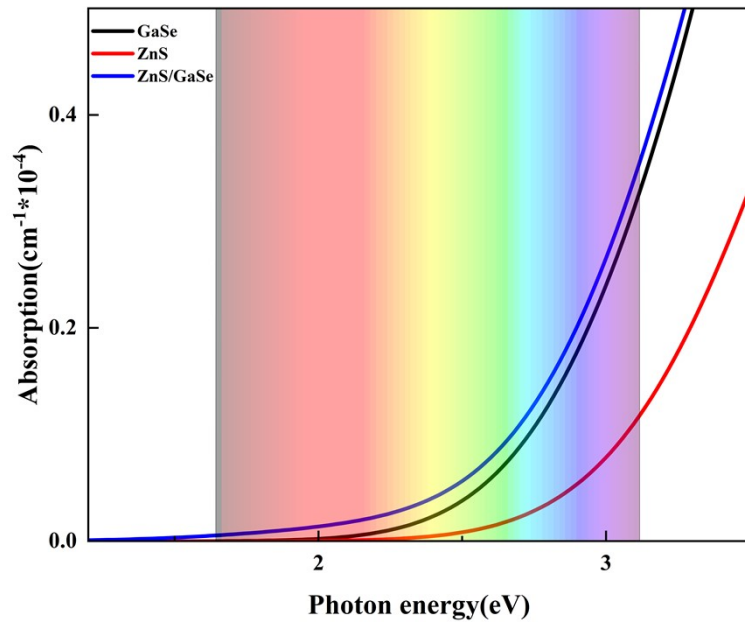

Fig.S5 The Inset of Fig. 11 (a)
